# Supplementary material for: Block-Wise Model Fit for Structural Equation Models With Experience Sampling Data
Source: Atypon-hosted journal article supplement (doi:10.1027/2151-2604/a000482), 2022-01-01
Supplement: 2151-2604_a000482_esm1.pdf [file 2151-2604_a000482_esm1.pdf]

### Standardized Root Mean Square Residual (SRMR)

The SRMR is a popular absolute fit index, which is not derived from the  $\chi^2$ -statistic. It is the standardized difference between the observed and model-implied covariances in the covariance matrices. The sample estimate of the global SRMR can be computed from the model-implied and observed (co)variance matrices  $\hat{\Sigma}$  and  $S$  with the formula (Bentler, 1995; Heene et al., 2011)

$$\text{SRMR} = \sqrt{2 \sum_{i=1}^p \sum_{j=1}^i \frac{\left( \frac{s_{ij} - \hat{\sigma}_{ij}}{\sqrt{s_{ii} s_{jj}}} \right)^2}{p(p+1)}} \quad (1)$$

where  $p$  stands for the number of observed variables;  $s_{ij}$  are the observed covariances;  $\hat{\sigma}_{ij}$  are the model-implied covariances;  $s_{ii}$  and  $s_{jj}$  are observed standard deviations. That means, that is,  $\hat{\sigma}_{ij}$  are the entries of  $\hat{\Sigma}$ , while  $s_{ij}$ ,  $s_{ii}$ , and  $s_{jj}$  are entries of  $S$ .

Block-wise versions of the SRMR can be computed from the block-wise model-implied variance-covariance matrix  $\hat{\Sigma}_k$  and observed variance-covariance matrix  $S_k$ , which both include only the (co)variances of the manifest variables uniquely associated with each block. That means, to compute  $\text{SRMR}_k$ , we apply the formula above, but  $\hat{\sigma}_{ij}$  are entries of  $\hat{\Sigma}_k$ , and likewise  $s_{ij}$ ,  $s_{ii}$ , and  $s_{jj}$  are entries of  $S_k$ . An  $\text{SRMR} \leq .08$  indicates good model fit (Hu & Bentler, 1999).

**Figure E1**

This figure visualizes the design of study 1 (pathmodels a and e) and study 2. Data is generated based on the models a-h. For misspecified models, the misspecification introduced through the correlations represented in red are either small (residual correlations:  $r = .15$ , structural error:  $r = .90$ ) or large (residual correlations:  $r = .40$ , structural error:  $r = .60$ ). Data is analysed with the respective model on the left (a and e). In study 1, data is generated and analysed based on models a and e, meaning that all models are correctly specified.

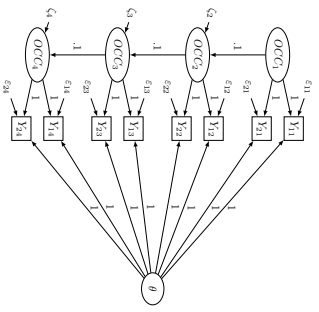

(a) Single-trait model without misspecification

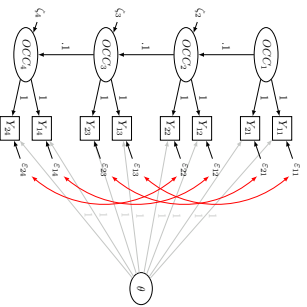

(b) Model with correlated residuals between days.

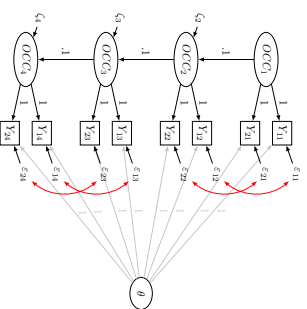

(c) Model with correlated residuals within days.

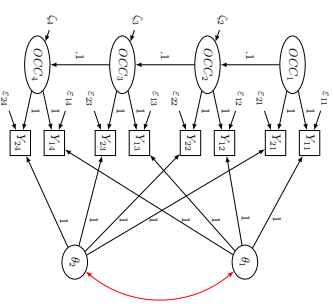

(d) Structural error: data is generated with correlated indicatorspecific traits

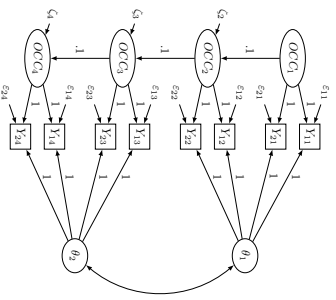

(e) Day-specific model without misspecification.

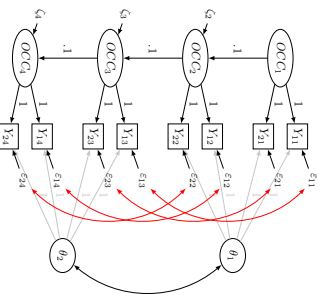

(f) Model with correlated residuals between days

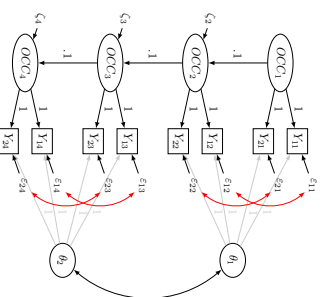

(g) Model with correlated residuals within days

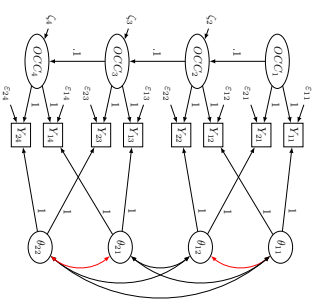

(h) Structural error: data is generated with correlated indicatorspecific traits for each day.

**Figure E2**

Results of study 1 for the single-trait model. Yuan et al. (2015) corrected estimates are given for the  $\chi^2$  rejection rates and Kolmogorov–Smirnov (KS) distances.

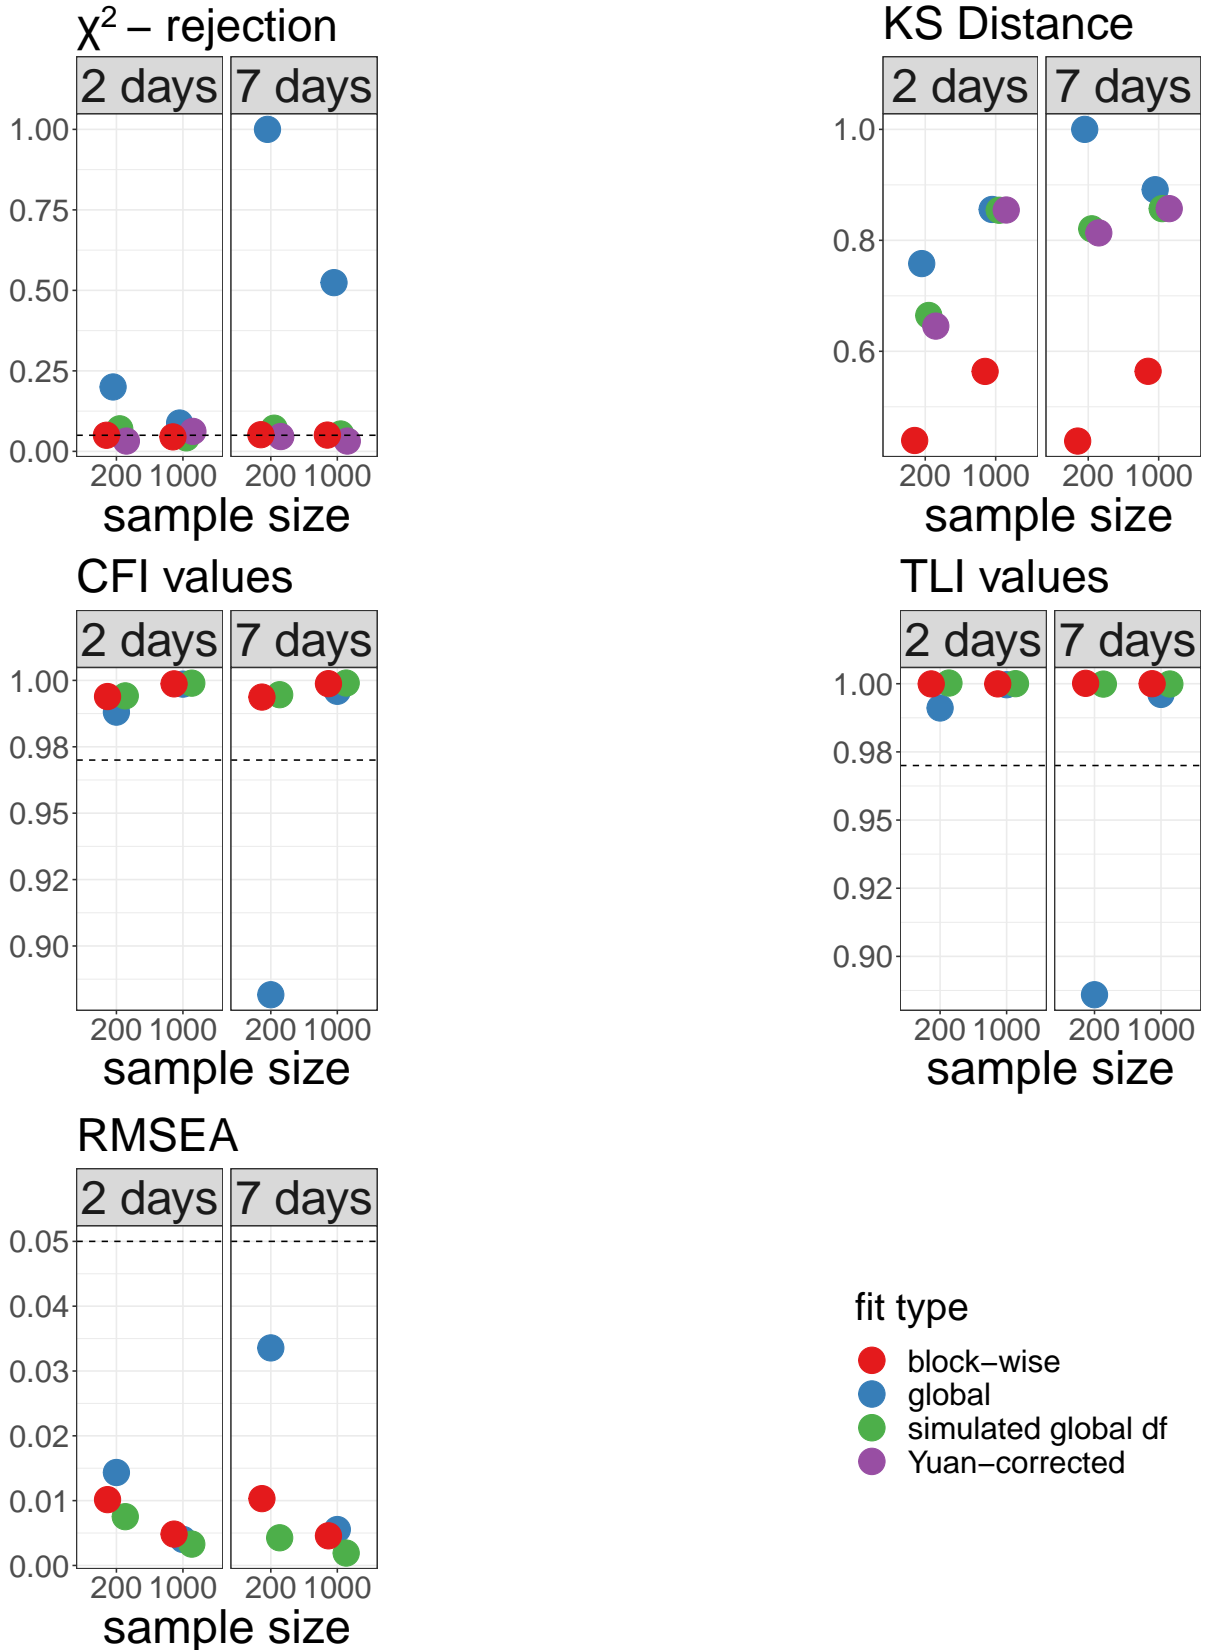

**Figure E3**

Results of study 1 for the model with day-specific traits. Yuan et al. (2015) corrected estimates are given for the  $\chi^2$  rejection rates and Kolmogorov–Smirnov (KS) distances.

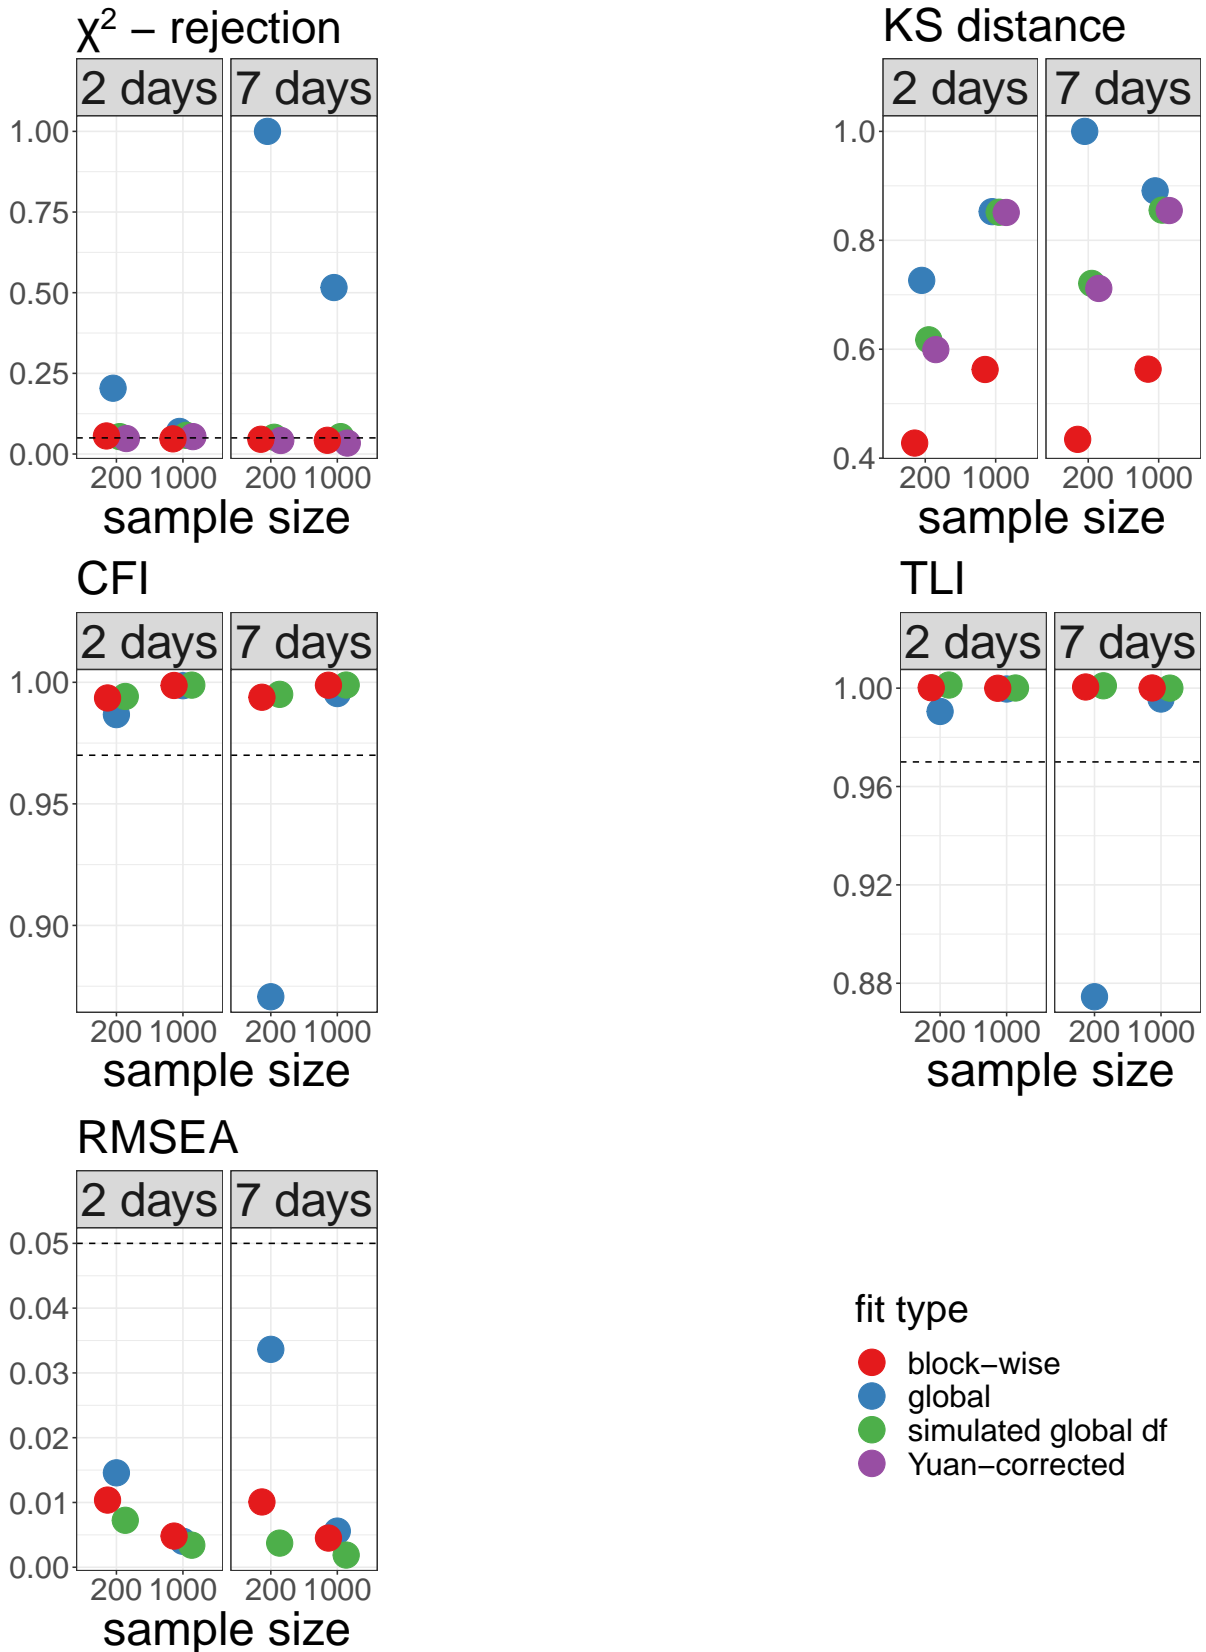

**Table E1**

*Results of study 2: ANOVAs comparing  $\chi^2/df$  ratios based on global evaluation, global with simulated degrees of freedom, block-wise fit evaluation, and Yuan et al. (2015) corrected  $\chi^2$  for misspecified models.*

| <b>effects on <math>\chi^2/df</math> ratio</b> |        |          |          |          |
|------------------------------------------------|--------|----------|----------|----------|
|                                                | df     | <i>F</i> | <i>p</i> | $\eta^2$ |
| model                                          | 1      | 4636.0   | < .001   | 0.001    |
| days                                           | 1      | 107115.8 | < .001   | 0.01     |
| misspecification                               | 5      | 412102.9 | < .001   | 0.26     |
| N                                              | 1      | 952053.4 | < .001   | 0.12     |
| fit type                                       | 3      | 119700.7 | < .001   | 0.05     |
| model:days                                     | 1      | 125.2    | < .001   | < .001   |
| model:misspecification                         | 5      | 1488.4   | < .001   | 0.001    |
| model:N                                        | 1      | 2330.4   | < .001   | < .001   |
| model:fit type                                 | 3      | 350.7    | < .001   | < .001   |
| days:misspecification                          | 5      | 37401.0  | < .001   | 0.02     |
| days:N                                         | 1      | 54119.1  | < .001   | 0.007    |
| days:fit type                                  | 3      | 20434.2  | < .001   | 0.008    |
| misspecification:N                             | 5      | 201819.0 | < .001   | 0.13     |
| misspecification:fit type                      | 15     | 105156.1 | < .001   | 0.20     |
| N:fit type                                     | 3      | 57895.2  | < .001   | 0.02     |
| model:days:misspecification                    | 5      | 21.6     | < .001   | < .001   |
| model:days:N                                   | 1      | 22.2     | < .001   | < .001   |
| model:days:fit type                            | 3      | 49.7     | < .001   | < .001   |
| model:misspecification:N                       | 5      | 403.8    | < .001   | < .001   |
| model:misspecification:fit type                | 15     | 288.5    | < .001   | 0.001    |
| model:N:fit type                               | 3      | 155.8    | < .001   | < .001   |
| days:misspecification:N                        | 5      | 9342.8   | < .001   | 0.006    |
| days:misspecification:fit type                 | 15     | 7127.0   | < .001   | 0.01     |
| days:N:fit type                                | 3      | 10079.7  | < .001   | 0.004    |
| misspecification:N:fit type                    | 15     | 58386.4  | < .001   | 0.11     |
| residuals                                      | 179876 |          |          |          |

**Table E2**

*Results of study 2: ANOVAs comparing CFI values based on global evaluation, global with simulated degrees of freedom, and block-wise fit evaluation for misspecified models.*

| <b>effects on CFI</b>           |        |          |          |          |
|---------------------------------|--------|----------|----------|----------|
|                                 | df     | <i>F</i> | <i>p</i> | $\eta^2$ |
| model                           | 1      | 5865.1   | < .001   | 0.002    |
| days                            | 1      | 89526.8  | < .001   | 0.03     |
| misspecification                | 5      | 337291.7 | < .001   | 0.57     |
| N                               | 1      | 14926.6  | < .001   | 0.005    |
| fit type                        | 2      | 133213.7 | < .001   | 0.09     |
| model:days                      | 1      | 289.0    | < .001   | < .001   |
| model:misspecification          | 5      | 4219.3   | < .001   | 0.007    |
| model:N                         | 1      | 76.4     | < .001   | < .001   |
| model:fit type                  | 2      | 1367.4   | < .001   | 0.001    |
| days:misspecification           | 5      | 16704.9  | < .001   | 0.03     |
| days:N                          | 1      | 9422.6   | < .001   | 0.003    |
| days:fit type                   | 2      | 42835.7  | < .001   | 0.03     |
| misspecification:N              | 5      | 289.0    | < .001   | < .001   |
| misspecification:fit type       | 10     | 36904.1  | < .001   | 0.13     |
| N:fit type                      | 2      | 19282.2  | < .001   | 0.01     |
| model:days:misspecification     | 5      | 276.2    | < .001   | < .001   |
| model:days:N                    | 1      | 16.4     | < .001   | < .001   |
| model:days:fit type             | 2      | 93.5     | < .001   | < .001   |
| model:misspecification:N        | 5      | 15.7     | < .001   | < .001   |
| model:misspecification:fit type | 10     | 1959.3   | < .001   | 0.007    |
| model:N:fit type                | 2      | 85.6     | < .001   | < .001   |
| days:misspecification:N         | 5      | 119.7    | < .001   | < .001   |
| days:misspecification:fit type  | 10     | 6071.9   | < .001   | 0.02     |
| days:N:fit type                 | 2      | 13693.5  | < .001   | 0.009    |
| misspecification:N:fit type     | 10     | 272.5    | < .001   | 0.001    |
| residuals                       | 155903 |          |          |          |

**Table E3**

*Results of study 2: ANOVAs comparing TLI values based on global evaluation, global with simulated degrees of freedom, and block-wise fit evaluation for misspecified models.*

| <b>effects on TLI</b>           |        |          |          |          |
|---------------------------------|--------|----------|----------|----------|
|                                 | df     | <i>F</i> | <i>p</i> | $\eta^2$ |
| model                           | 1      | 5820.8   | < .001   | 0.002    |
| days                            | 1      | 136038.6 | < .001   | 0.04     |
| misspecification                | 5      | 360458.7 | < .001   | 0.52     |
| N                               | 1      | 8669.4   | < .001   | < .001   |
| fit type                        | 2      | 253606.6 | < .001   | 0.15     |
| model:days                      | 1      | 334.1    | < .001   | < .001   |
| model:misspecification          | 5      | 4899.5   | < .001   | 0.007    |
| model:N                         | 1      | 143.8    | < .001   | < .001   |
| model:fit type                  | 2      | 1445.6   | < .001   | 0.001    |
| days:misspecification           | 5      | 19839.7  | < .001   | 0.03     |
| days:N                          | 1      | 8323.3   | < .001   | 0.002    |
| days:fit type                   | 2      | 72257.6  | < .001   | 0.04     |
| misspecification:N              | 5      | 934.5    | < .001   | 0.001    |
| misspecification:fit type       | 10     | 38277.6  | < .001   | 0.11     |
| N:fit type                      | 2      | 33428.6  | < .001   | 0.02     |
| model:days:misspecification     | 5      | 373.1    | < .001   | 0.001    |
| model:days:N                    | 1      | 37.0     | < .001   | < .001   |
| model:days:fit type             | 2      | 104.2    | < .001   | < .001   |
| model:misspecification:N        | 5      | 26.8     | < .001   | < .001   |
| model:misspecification:fit type | 10     | 2303.8   | < .001   | 0.007    |
| model:N:fit type                | 2      | 137.4    | < .001   | < .001   |
| days:misspecification:N         | 5      | 322.2    | < .001   | < .001   |
| days:misspecification:fit type  | 10     | 7123.1   | < .001   | 0.02     |
| days:N:fit type                 | 2      | 21879.2  | < .001   | 0.01     |
| misspecification:N:fit type     | 10     | 547.0    | < .001   | 0.002    |
| Residuals                       | 155903 |          |          |          |

**Table E4**

*Results of study 2: ANOVAs comparing RMSEA values based on global evaluation, global with simulated degrees of freedom, and block-wise fit evaluation for misspecified models.*

| <b>effects on RMSEA</b>         |        |          |          |          |
|---------------------------------|--------|----------|----------|----------|
|                                 | df     | <i>F</i> | <i>p</i> | $\eta^2$ |
| model                           | 1      | 2676.4   | < .001   | 0.001    |
| days                            | 1      | 27321.8  | < .001   | 0.01     |
| misspecification                | 5      | 192939.9 | < .001   | 0.53     |
| N                               | 1      | 1806.8   | < .001   | 0.001    |
| fit type                        | 2      | 12138.8  | < .001   | 0.01     |
| model:days                      | 1      | 10.9     | < .001   | < .001   |
| model:misspecification          | 5      | 633.7    | < .001   | 0.002    |
| model:N                         | 1      | 11.8     | < .001   | < .001   |
| model:fit type                  | 2      | 534.3    | < .001   | 0.001    |
| days:misspecification           | 5      | 8794.3   | < .001   | 0.02     |
| days:N                          | 1      | 1301.3   | < .001   | 0.001    |
| days:fit type                   | 2      | 11240.8  | < .001   | 0.01     |
| misspecification:N              | 5      | 150.3    | < .001   | < .001   |
| misspecification:fit type       | 10     | 53426.9  | < .001   | 0.29     |
| N:fit type                      | 2      | 3526.6   | < .001   | 0.004    |
| model:days:misspecification     | 5      | 4.2      | < .001   | < .001   |
| model:days:N                    | 1      | 1.0      | 0.306    | < .001   |
| model:days:fit type             | 2      | 3.9      | 0.021    | < .001   |
| model:misspecification:N        | 5      | 1.7      | 0.128    | < .001   |
| model:misspecification:fit type | 10     | 271.2    | < .001   | 0.001    |
| model:N:fit type                | 2      | 11.4     | < .001   | < .001   |
| days:misspecification:N         | 5      | 28.2     | < .001   | < .001   |
| days:misspecification:fit type  | 10     | 3180.7   | < .001   | 0.02     |
| days:N:fit type                 | 2      | 1475.9   | < .001   | 0.002    |
| misspecification:N:fit type     | 10     | 277.9    | < .001   | 0.002    |
| residuals                       | 155903 |          |          |          |



**Figure E4**

Overview of the results of study 2 for each fit index. The average fit values are provided as symbols for the different simulation conditions. Results are averaged across the two different LST models, because there were no main or interaction effects of the model. The six different misspecifications are provided on the x-axis. *Between(S)*: omitted residuals correlations between days ( $r = .15$ ); *Between(L)*: likewise but with  $r = .40$ ; *Within(S)*: omitted residual correlations within days ( $r = .15$ ); *Within(L)*: likewise but with  $r = .40$ ; *Structural(S)*: data is generated with correlated indicatorspecific traits ( $r = .90$ ); *Structural(L)*: likewise but with  $r = .60$ .

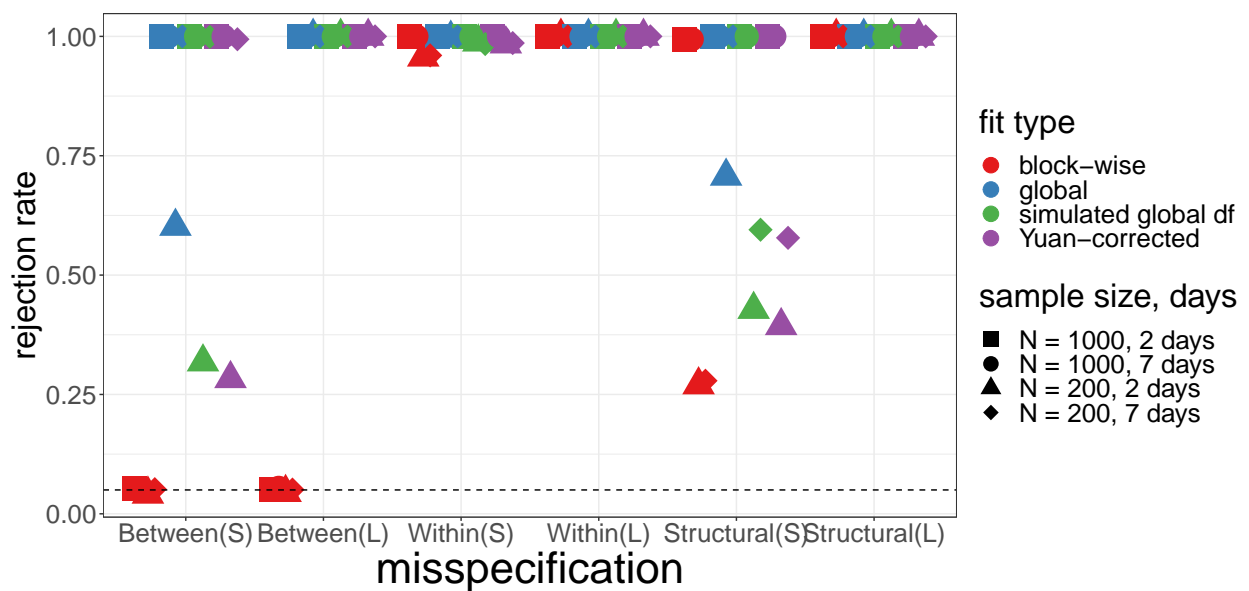

(a)  $\chi^2$  rejection rates for all conditions, with  $\alpha = .05$  included as a dotted line.

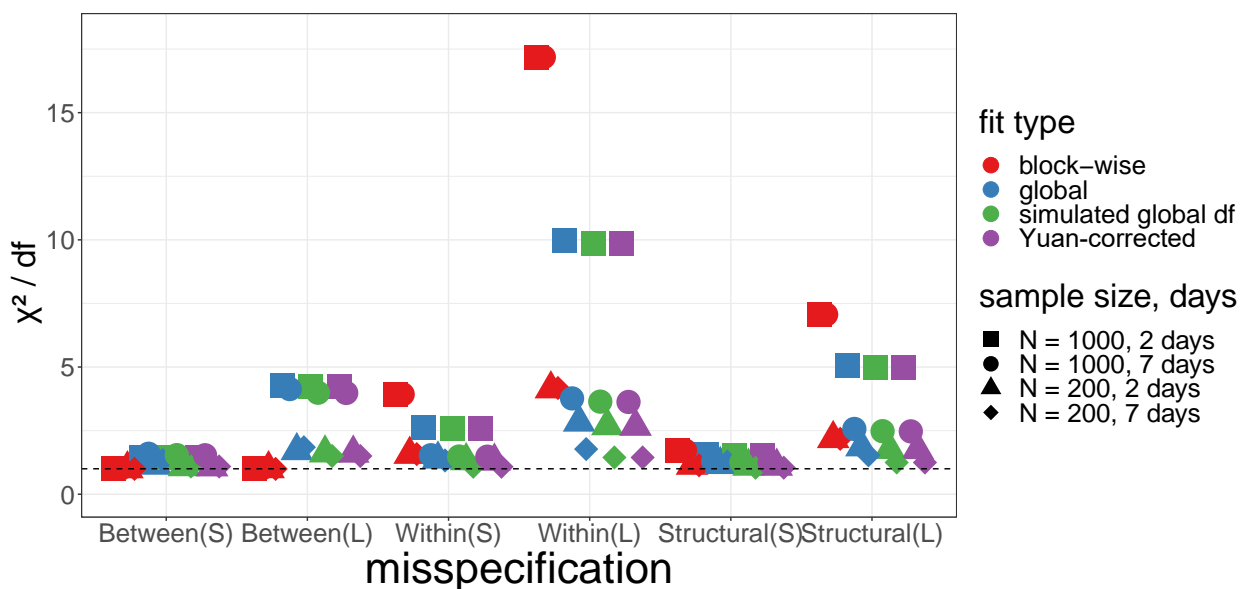

(b) Average  $\chi^2/df$  ratios for all conditions. The dotted line at  $\chi^2/df = 1$  represents perfect fit.

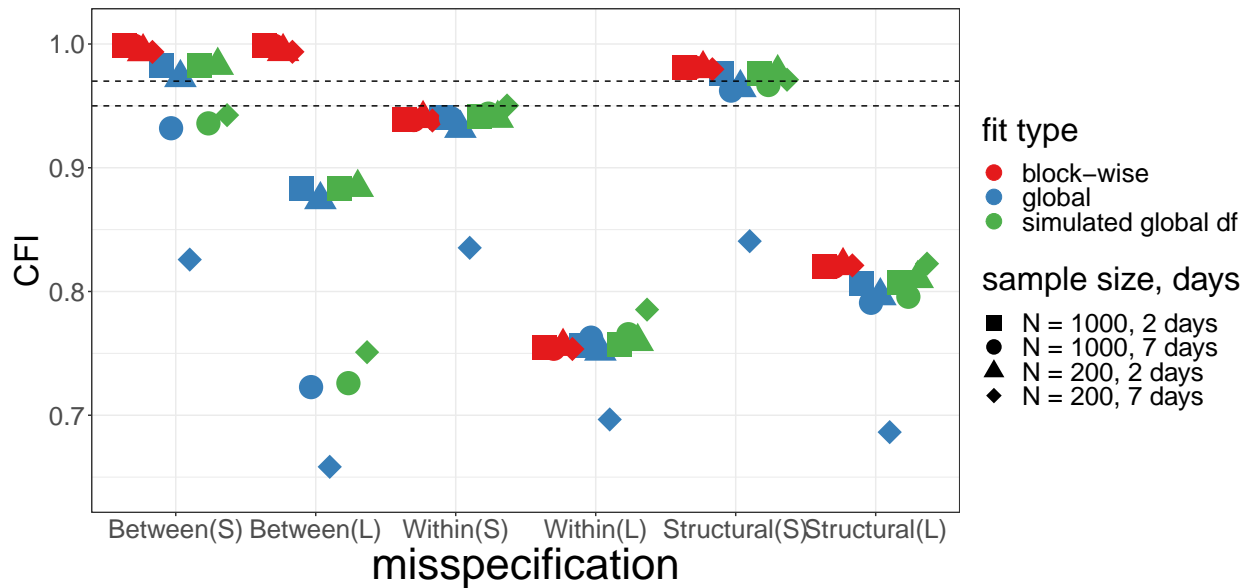

(c) Average CFI values for all conditions. Lines are included at CFI = .95 and .97.

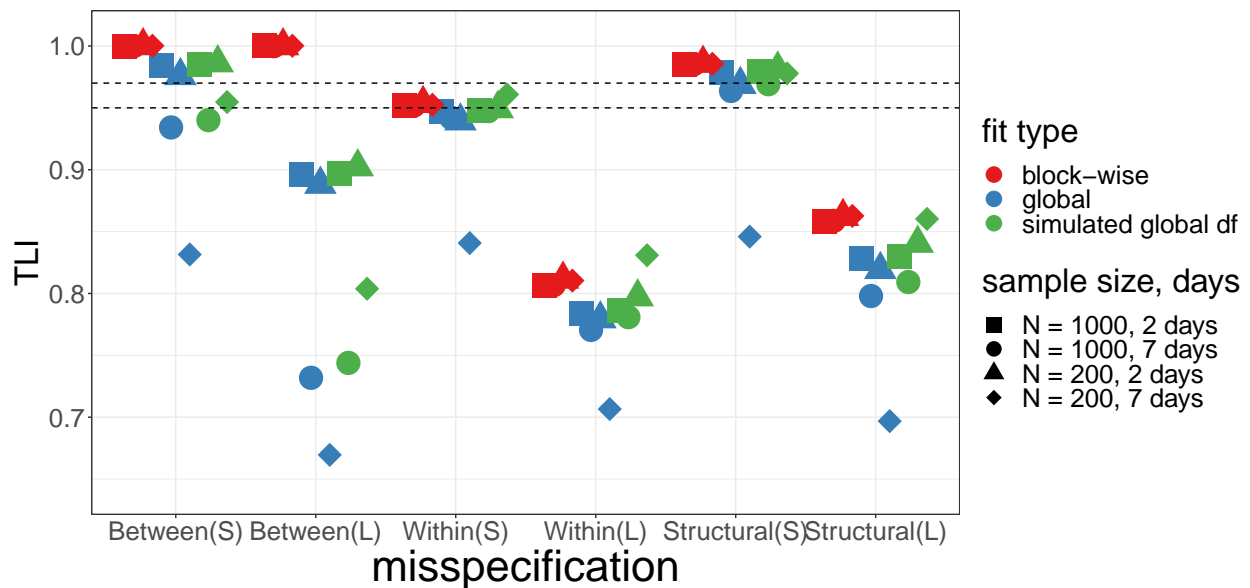

(d) Average TLI values for all conditions. Lines are included at TLI = .95 and .97.

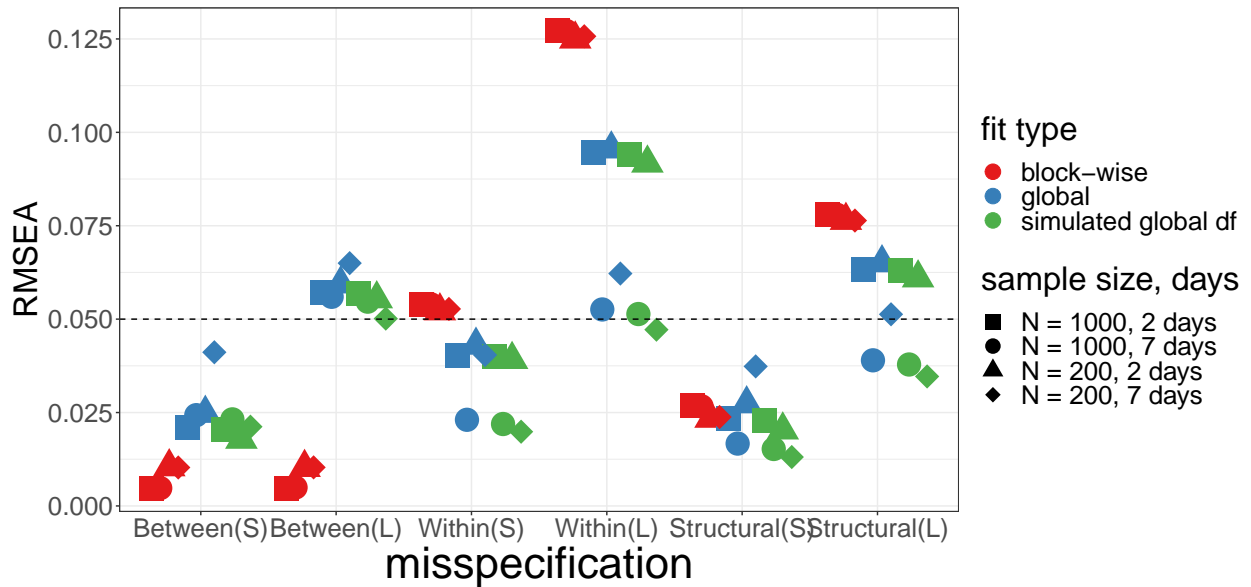

(e) Average RMSEA values for all conditions. A dotted line is included at RMSEA = .05.

## References

- Bentler, P. M. (1995). *Eqs structural equations program manual* (Vol. 6). Multivariate software Encino, CA.
- Heene, M., Hilbert, S., Draxler, C., Ziegler, M., & Bühner, M. (2011). Masking misfit in confirmatory factor analysis by increasing unique variances: A cautionary note on the usefulness of cutoff values of fit indices. *Psychological methods*, 16(3), 319.
- Hu, L.-t., & Bentler, P. M. (1999). Cutoff criteria for fit indexes in covariance structure analysis: Conventional criteria versus new alternatives. *Structural Equation Modeling: A Multidisciplinary Journal*, 6(1), 1–55.  
<https://doi.org/https://doi.org/10.1080/10705519909540118>
- Yuan, K.-H., Tian, Y., & Yanagihara, H. (2015). Empirical correction to the likelihood ratio statistic for structural equation modeling with many variables. *Psychometrika*, 80(2), 379–405. <https://doi.org/10.1007/s11336-013-9386-5>
